# Supplementary material
Source: publisher site journal article supplement (https://www.dovepress.com/article/313841)
Supplement: Supplementary file 1 [file get_supplementary_file.php]

## **Supporting information**

**Appendix A-Supplementary materials:** Detailed search strategy (Inclusion and exclusion criteria and comprehensive search terms).

**Appendix B-Supplementary materials:** PRISMA Checklist.

**Appendix C-Supplementary materials:** Methodological Quality evaluation.

**APPENDIX – A -**

| <b>Criterion</b>                | <b>Inclusion</b>                                                                                                                                                                                                                                                                                                                        | <b>Exclusion</b>                                                                                                                                                                                      |
|---------------------------------|-----------------------------------------------------------------------------------------------------------------------------------------------------------------------------------------------------------------------------------------------------------------------------------------------------------------------------------------|-------------------------------------------------------------------------------------------------------------------------------------------------------------------------------------------------------|
| <b>Time period</b>              | From inception to 25 <sup>th</sup> March 2021                                                                                                                                                                                                                                                                                           | Studies outside these dates                                                                                                                                                                           |
| <b>Language</b>                 | English (recognized language of international scientific debate)                                                                                                                                                                                                                                                                        | Non-English                                                                                                                                                                                           |
| <b>Type of article</b>          | Original research, published in a peer review journal. Qualitative or quantitative studies; review; systematic review; narrative review; scoping review; meta-analysis; commentaries, letter, editorial                                                                                                                                 | Articles that were not peer reviewed, only abstract available; grey literature                                                                                                                        |
| <b>Ethics clearance</b>         | Studies with approved ethics notification                                                                                                                                                                                                                                                                                               | Studies without approved ethics notification                                                                                                                                                          |
| <b>Study focus</b>              | Adherence/compliance to therapies (pharmacological therapies/Non Invasive Ventilation (NIV)/Long Term Oxygen Therapy (LTOT), Pulmonary Rehabilitation (PR) etc.) and their relationships with anxiety and depression                                                                                                                    | Studies that don't consider the relationships between anxiety, depression and adherence/compliance                                                                                                    |
| <b>Literature focus</b>         | Studies that explicitly discuss the patient's point of view and his/her experience, studies that present a clear theoretical framework on the patients' experience, studies that focus on the experience of using the treatment, anxiety and depression e indicators and monitoring, in the context of chronic pathologies considered   | Articles that didn't make a passing or token reference to anxiety and depression in relation to therapies. The caregiver's and/or physicians' point of view                                           |
| <b>Population and sample</b>    | Chronic Obstructive Pulmonary Disease (COPD)                                                                                                                                                                                                                                                                                            | All the other chronic diseases                                                                                                                                                                        |
| <b>Detailed search strategy</b> |                                                                                                                                                                                                                                                                                                                                         |                                                                                                                                                                                                       |
| <b>Database</b>                 | <b>Mesh Terms Combination</b>                                                                                                                                                                                                                                                                                                           | <b>Filters</b>                                                                                                                                                                                        |
| Pubmed                          | "COPD" OR "Chronic Obstructive Pulmonary Disease*" AND ("Anxiety" OR "depression") AND ("adherence" OR "compliance") AND ("NIV" OR "Non Invasive Ventilation" OR "Oxygen" OR "Oxygen Therapy" OR "Long Term Oxygen Therapy" OR "LTOT" OR "theraph*" OR "pharmacological theraph*" OR "medication*" OR "bronchodilator*" OR "inhalator*" | Humans; English; Full Text; Clinical Study; Clinical Trial; Controlled Clinical Trial; Meta-Analysis; Observational Study; Randomized Controlled Trial; Review; Systematic Review; Comparative Study; |
| Scopus                          | "COPD" OR "Chronic Obstructive Pulmonary Disease*" AND ("Anxiety" OR "depression") AND ("adherence" OR "compliance") AND ("NIV" OR "Non Invasive Ventilation" OR "Oxygen" OR "Oxygen Therapy" OR "Long Term Oxygen Therapy" OR "LTOT" OR "theraph*" OR "pharmacological theraph*" OR                                                    | Human/Humans; English; Article; Review; Journal; Psychology; Health Professions; Chronic Obstructive Lung Disease                                                                                     |

|                  |                                                                                                                                                                                                                                                                                                                                          |                          |
|------------------|------------------------------------------------------------------------------------------------------------------------------------------------------------------------------------------------------------------------------------------------------------------------------------------------------------------------------------------|--------------------------|
|                  | "medication*" OR "bronchodilator*" OR "inhalator*"                                                                                                                                                                                                                                                                                       |                          |
| Web of Science   | "COPD" OR "Chronic Obstructive Pulmonary Disease*" AND ("Anxiety" OR "depression") AND ("adherence" OR "compliance") AND ("NIV" OR "Non Invasive Ventilation" OR "Oxygen" OR "Oxygen Therapy" OR "Long Term Oxygen Therapy" OR "LTOT" OR "theraph*" OR "pharmacological theraph*" OR "medication*" OR "bronchodilator*" OR "inhalator*"  | English; Article; Review |
| Cochrane Library | "COPD" OR "Chronic Obstructive Pulmonary Disease*" AND ("Anxiety" OR "depression") AND ("adherence" OR "compliance") AND ("NIV" OR "Non Invasive Ventilation" OR "Oxygen" OR "Oxygen Therapy" OR "Long Term Oxygen Therapy" OR "LTOT" OR "theraph*" OR "pharmacological theraph*" OR "medication*" OR "bronchodilator*" OR "inhalator*"  | English; Trials; Review  |
| Psycinfo         | "COPD" OR "Chronic Obstructive Pulmonary Disease*" AND ("Anxiety" OR "depression") AND ("adherence" OR "compliance") AND ("NIV" OR "Non Invasive Ventilation" OR "Oxygen" OR "Oxygen Therapy" OR "Long Term Oxygen Therapy" OR "LTOT" OR "theraph*" OR "pharmacological theraph*" OR "medicati on*" OR "bronchodilator*" OR "inhalator*" | Humans; English          |

Additional records were identified through other sources, specifically from the references of “Atlantis E., Fahey P., Cochrane B., Smith S. (2013). Bidirectional associations between clinically relevant depression or anxiety and COPD: a systematic review and meta-analysis. *Chestnet*, 144(3), 766-777”.

**APPENDIX - B -**

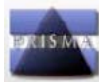

# PRISMA 2009 Checklist

| Section/topic                      | #  | Checklist item                                                                                                                                                                                                                                                                                              | Reported on page # |
|------------------------------------|----|-------------------------------------------------------------------------------------------------------------------------------------------------------------------------------------------------------------------------------------------------------------------------------------------------------------|--------------------|
| <b>TITLE</b>                       |    |                                                                                                                                                                                                                                                                                                             |                    |
| Title                              | 1  | Identify the report as a systematic review, meta-analysis, or both.                                                                                                                                                                                                                                         | 1                  |
| <b>ABSTRACT</b>                    |    |                                                                                                                                                                                                                                                                                                             |                    |
| Structured summary                 | 2  | Provide a structured summary including, as applicable: background; objectives; data sources; study eligibility criteria, participants, and interventions; study appraisal and synthesis methods; results; limitations; conclusions and implications of key findings; systematic review registration number. | 2                  |
| <b>INTRODUCTION</b>                |    |                                                                                                                                                                                                                                                                                                             |                    |
| Rationale                          | 3  | Describe the rationale for the review in the context of what is already known.                                                                                                                                                                                                                              | 3                  |
| Objectives                         | 4  | Provide an explicit statement of questions being addressed with reference to participants, interventions, comparisons, outcomes, and study design (PICOS).                                                                                                                                                  | 44                 |
| <b>METHODS</b>                     |    |                                                                                                                                                                                                                                                                                                             |                    |
| Protocol and registration          | 5  | Indicate if a review protocol exists, if and where it can be accessed (e.g., Web address), and, if available, provide registration information including registration number.                                                                                                                               | 5                  |
| Eligibility criteria               | 6  | Specify study characteristics (e.g., PICOS, length of follow-up) and report characteristics (e.g., years considered, language, publication status) used as criteria for eligibility, giving rationale.                                                                                                      | 5                  |
| Information sources                | 7  | Describe all information sources (e.g., databases with dates of coverage, contact with study authors to identify additional studies) in the search and date last searched.                                                                                                                                  | 5                  |
| Search                             | 8  | Present full electronic search strategy for at least one database, including any limits used, such that it could be repeated.                                                                                                                                                                               | Appendix A         |
| Study selection                    | 9  | State the process for selecting studies (i.e., screening, eligibility, included in systematic review, and, if applicable, included in the meta-analysis).                                                                                                                                                   | 5                  |
| Data collection process            | 10 | Describe method of data extraction from reports (e.g., piloted forms, independently, in duplicate) and any processes for obtaining and confirming data from investigators.                                                                                                                                  | 6                  |
| Data items                         | 11 | List and define all variables for which data were sought (e.g., PICOS, funding sources) and any assumptions and simplifications made.                                                                                                                                                                       | 6-7                |
| Risk of bias in individual studies | 12 | Describe methods used for assessing risk of bias of individual studies (including specification of whether this was done at the study or outcome level), and how this information is to be used in any data synthesis.                                                                                      | 6                  |
| Summary measures                   | 13 | State the principal summary measures (e.g., risk ratio, difference in means).                                                                                                                                                                                                                               | N/A                |
| Synthesis of results               | 14 | Describe the methods of handling data and combining results of studies, if done, including measures of consistency (e.g., $I^2$ ) for each meta-analysis.                                                                                                                                                   | N/A                |

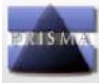

# PRISMA 2009 Checklist

| Section/topic                 | #  | Checklist item                                                                                                                                                                                           | Reported on page #              |
|-------------------------------|----|----------------------------------------------------------------------------------------------------------------------------------------------------------------------------------------------------------|---------------------------------|
| Risk of bias across studies   | 15 | Specify any assessment of risk of bias that may affect the cumulative evidence (e.g., publication bias, selective reporting within studies).                                                             | 12-13 and Appendix C            |
| Additional analyses           | 16 | Describe methods of additional analyses (e.g., sensitivity or subgroup analyses, meta-regression), if done, indicating which were pre-specified.                                                         | N/A                             |
| <b>RESULTS</b>                |    |                                                                                                                                                                                                          |                                 |
| Study selection               | 17 | Give numbers of studies screened, assessed for eligibility, and included in the review, with reasons for exclusions at each stage, ideally with a flow diagram.                                          | 6                               |
| Study characteristics         | 18 | For each study, present characteristics for which data were extracted (e.g., study size, PICOS, follow-up period) and provide the citations.                                                             | 6-13; Table 1, Table 2, Table 3 |
| Risk of bias within studies   | 19 | Present data on risk of bias of each study and, if available, any outcome level assessment (see item 12).                                                                                                | 12, 13; Appendix C              |
| Results of individual studies | 20 | For all outcomes considered (benefits or harms), present, for each study: (a) simple summary data for each intervention group (b) effect estimates and confidence intervals, ideally with a forest plot. | 6-13; Table 1, Table 2, Table 3 |
| Synthesis of results          | 21 | Present results of each meta-analysis done, including confidence intervals and measures of consistency.                                                                                                  | N/A                             |
| Risk of bias across studies   | 22 | Present results of any assessment of risk of bias across studies (see Item 15).                                                                                                                          | 12-13; Appendix C               |
| Additional analysis           | 23 | Give results of additional analyses, if done (e.g., sensitivity or subgroup analyses, meta-regression [see Item 16]).                                                                                    | N/A                             |
| <b>DISCUSSION</b>             |    |                                                                                                                                                                                                          |                                 |
| Summary of evidence           | 24 | Summarize the main findings including the strength of evidence for each main outcome; consider their relevance to key groups (e.g., healthcare providers, users, and policy makers).                     | 13, 14                          |
| Limitations                   | 25 | Discuss limitations at study and outcome level (e.g., risk of bias), and at review-level (e.g., incomplete retrieval of identified research, reporting bias).                                            | 13, 14                          |
| Conclusions                   | 26 | Provide a general interpretation of the results in the context of other evidence, and implications for future research.                                                                                  | 15                              |
| <b>FUNDING</b>                |    |                                                                                                                                                                                                          |                                 |
| Funding                       | 27 | Describe sources of funding for the systematic review and other support (e.g., supply of data); role of funders for the systematic review.                                                               | N/A                             |

From: Moher D, Liberati A, Tetzlaff J, Altman DG, The PRISMA Group (2009). Preferred Reporting Items for Systematic Reviews and Meta-Analyses: The PRISMA Statement. PLoS Med 6(7): e1000097. doi:10.1371/journal.pmed1000097

For more information, visit: [www.prisma-statement.org](http://www.prisma-statement.org).

APPENDIX - C -

|                                                           |                                                                                                                                                                                     |                      |                                                              |                 |                                                                                                                                                                                                                   |
|-----------------------------------------------------------|-------------------------------------------------------------------------------------------------------------------------------------------------------------------------------------|----------------------|--------------------------------------------------------------|-----------------|-------------------------------------------------------------------------------------------------------------------------------------------------------------------------------------------------------------------|
| <b>Unique ID</b>                                          | A318                                                                                                                                                                                | <b>Study ID</b>      | A318                                                         | <b>Assessor</b> | ST                                                                                                                                                                                                                |
| <b>Ref or Label</b>                                       | Personalised Intervention for people with depression and severe COPD                                                                                                                | <b>Aim</b>           | assignment to intervention (the 'intention-to-treat' effect) |                 |                                                                                                                                                                                                                   |
| <b>Experimental</b>                                       | Introduction of Personalised intervention for depression and COPD (PID-C)                                                                                                           | <b>Comparator</b>    | Treatment As Usual (TAU)                                     | <b>Source</b>   | Journal article(s) with results of the trial                                                                                                                                                                      |
| <b>Outcome</b>                                            | remission/reduction of depressive symptoms and dyspnoea-related disability                                                                                                          | <b>Results</b>       |                                                              | <b>Weight</b>   | 1                                                                                                                                                                                                                 |
| <b>Domain</b>                                             | <b>Signalling question</b>                                                                                                                                                          |                      | <b>Response</b>                                              |                 | <b>Comments</b>                                                                                                                                                                                                   |
| <b>Bias arising from the randomization process</b>        | 1.1 Was the allocation sequence random?                                                                                                                                             |                      | Y                                                            |                 |                                                                                                                                                                                                                   |
|                                                           | 1.2 Was the allocation sequence concealed until participants were enrolled and assigned to interventions?                                                                           |                      | Y                                                            |                 |                                                                                                                                                                                                                   |
|                                                           | 1.3 Did baseline differences between intervention groups suggest a problem with the randomization process?                                                                          |                      | PN                                                           |                 |                                                                                                                                                                                                                   |
|                                                           | <b>Risk of bias judgement</b>                                                                                                                                                       |                      | <b>Low</b>                                                   |                 |                                                                                                                                                                                                                   |
| <b>Bias due to deviations from intended interventions</b> | 2.1. Were participants aware of their assigned intervention during the trial?                                                                                                       |                      | PY                                                           |                 |                                                                                                                                                                                                                   |
|                                                           | 2.2. Were carers and people delivering the interventions aware of participants' assigned intervention during the trial?                                                             |                      | PY                                                           |                 |                                                                                                                                                                                                                   |
|                                                           | 2.3. If Y/PY/NI to 2.1 or 2.2: Were there deviations from the intended intervention that arose because of the experimental context?                                                 |                      | N                                                            |                 |                                                                                                                                                                                                                   |
|                                                           | 2.4 If Y/PY to 2.3: Were these deviations likely to have affected the outcome?                                                                                                      |                      | NA                                                           |                 |                                                                                                                                                                                                                   |
|                                                           | 2.5. If Y/PY/NI to 2.4: Were these deviations from intended intervention balanced between groups?                                                                                   |                      | NA                                                           |                 |                                                                                                                                                                                                                   |
|                                                           | 2.6 Was an appropriate analysis used to estimate the effect of assignment to intervention?                                                                                          |                      | NI                                                           |                 |                                                                                                                                                                                                                   |
|                                                           | 2.7 If N/PN/NI to 2.6: Was there potential for a substantial impact (on the result) of the failure to analyse participants in the group to which they were randomized?              |                      | PN                                                           |                 |                                                                                                                                                                                                                   |
| <b>Risk of bias judgement</b>                             |                                                                                                                                                                                     | <b>Some concerns</b> |                                                              |                 |                                                                                                                                                                                                                   |
| <b>Bias due to missing outcome data</b>                   | 3.1 Were data for this outcome available for all, or nearly all, participants randomized?                                                                                           |                      | N                                                            |                 |                                                                                                                                                                                                                   |
|                                                           | 3.2 If N/PN/NI to 3.1: Is there evidence that result was not biased by missing outcome data?                                                                                        |                      | PY                                                           |                 |                                                                                                                                                                                                                   |
|                                                           | 3.3 If N/PN to 3.2: Could missingness in the outcome depend on its true value?                                                                                                      |                      | NA                                                           |                 |                                                                                                                                                                                                                   |
|                                                           | 3.4 If Y/PY/NI to 3.3: Is it likely that missingness in the outcome depended on its true value?                                                                                     |                      | NA                                                           |                 |                                                                                                                                                                                                                   |
|                                                           | <b>Risk of bias judgement</b>                                                                                                                                                       |                      | <b>Low</b>                                                   |                 | Authors identify high attrition as a limitation but clarify that there were no significant differences in demographics, depression and disability between those who dropped out and those who completed the study |
| <b>Bias in measurement of the outcome</b>                 | 4.1 Was the method of measuring the outcome inappropriate?                                                                                                                          |                      | N                                                            |                 |                                                                                                                                                                                                                   |
|                                                           | 4.2 Could measurement or ascertainment of the outcome have differed between intervention groups?                                                                                    |                      | PN                                                           |                 |                                                                                                                                                                                                                   |
|                                                           | 4.3 Were outcome assessors aware of the intervention received by study participants?                                                                                                |                      | PN                                                           |                 |                                                                                                                                                                                                                   |
|                                                           | 4.4 If Y/PY/NI to 4.3: Could assessment of the outcome have been influenced by knowledge of intervention received?                                                                  |                      | NA                                                           |                 |                                                                                                                                                                                                                   |
|                                                           | 4.5 If Y/PY/NI to 4.4: Is it likely that assessment of the outcome was influenced by knowledge of intervention received?                                                            |                      | NA                                                           |                 |                                                                                                                                                                                                                   |
|                                                           | <b>Risk of bias judgement</b>                                                                                                                                                       |                      | <b>Some concerns</b>                                         |                 |                                                                                                                                                                                                                   |
| <b>Bias in selection of the reported result</b>           | 5.1 Were the data that produced this result analysed in accordance with a pre-specified analysis plan that was finalized before unblinded outcome data were available for analysis? |                      | Y                                                            |                 |                                                                                                                                                                                                                   |
|                                                           | 5.2 ... multiple eligible outcome measurements (e.g. scales, definitions, time points) within the outcome domain?                                                                   |                      | PN                                                           |                 |                                                                                                                                                                                                                   |
|                                                           | 5.3 ... multiple eligible analyses of the data?                                                                                                                                     |                      | PN                                                           |                 |                                                                                                                                                                                                                   |
|                                                           | <b>Risk of bias judgement</b>                                                                                                                                                       |                      | <b>Low</b>                                                   |                 |                                                                                                                                                                                                                   |
| <b>Overall bias</b>                                       | <b>Risk of bias judgement</b>                                                                                                                                                       |                      | <b>Some concerns</b>                                         |                 | The article is a very short report and not all the information are available                                                                                                                                      |



|                                                           |                                                                                                                                                                                     |                   |                                                              |                                                                                                                                                                                                                                |                                              |
|-----------------------------------------------------------|-------------------------------------------------------------------------------------------------------------------------------------------------------------------------------------|-------------------|--------------------------------------------------------------|--------------------------------------------------------------------------------------------------------------------------------------------------------------------------------------------------------------------------------|----------------------------------------------|
| <b>Unique ID</b>                                          | A452                                                                                                                                                                                | <b>Study ID</b>   | A452                                                         | <b>Assessor</b>                                                                                                                                                                                                                | ST                                           |
| <b>Ref or Label</b>                                       | Untangling Therapeutic Ingredients of a Personalized Intervention for Patients with Depression and Severe COPD                                                                      | <b>Aim</b>        | assignment to intervention (the 'intention-to-treat' effect) |                                                                                                                                                                                                                                |                                              |
| <b>Experimental</b>                                       | Introduction of Personalized intervention for depressed patients with COPD (PID-C)                                                                                                  | <b>Comparator</b> | Usual Care (UC)                                              | <b>Source</b>                                                                                                                                                                                                                  | Journal article(s) with results of the trial |
| <b>Outcome</b>                                            | depressive symptoms and dyspnea-related disability                                                                                                                                  | <b>Results</b>    |                                                              | <b>Weight</b>                                                                                                                                                                                                                  | 1                                            |
| <b>Domain</b>                                             | <b>Signalling question</b>                                                                                                                                                          |                   | <b>Response</b>                                              |                                                                                                                                                                                                                                | <b>Comments</b>                              |
| <b>Bias arising from the randomization process</b>        | 1.1 Was the allocation sequence random?                                                                                                                                             |                   | Y                                                            |                                                                                                                                                                                                                                |                                              |
|                                                           | 1.2 Was the allocation sequence concealed until participants were enrolled and assigned to interventions?                                                                           |                   | Y                                                            |                                                                                                                                                                                                                                |                                              |
|                                                           | 1.3 Did baseline differences between intervention groups suggest a problem with the randomization process?                                                                          |                   | PN                                                           |                                                                                                                                                                                                                                |                                              |
|                                                           | <b>Risk of bias judgement</b>                                                                                                                                                       |                   | <b>Low</b>                                                   |                                                                                                                                                                                                                                |                                              |
| <b>Bias due to deviations from intended interventions</b> | 2.1.Were participants aware of their assigned intervention during the trial?                                                                                                        |                   | N                                                            |                                                                                                                                                                                                                                |                                              |
|                                                           | 2.2.Were carers and people delivering the interventions aware of participants' assigned intervention during the trial?                                                              |                   | PY                                                           |                                                                                                                                                                                                                                |                                              |
|                                                           | 2.3. If Y/PY/NI to 2.1 or 2.2: Were there deviations from the intended intervention that arose because of the experimental context?                                                 |                   | N                                                            |                                                                                                                                                                                                                                |                                              |
|                                                           | 2.4 If Y/PY to 2.3: Were these deviations likely to have affected the outcome?                                                                                                      |                   | NA                                                           |                                                                                                                                                                                                                                |                                              |
|                                                           | 2.5. If Y/PY/NI to 2.4: Were these deviations from intended intervention balanced between groups?                                                                                   |                   | NA                                                           |                                                                                                                                                                                                                                |                                              |
|                                                           | 2.6 Was an appropriate analysis used to estimate the effect of assignment to intervention?                                                                                          |                   | PY                                                           |                                                                                                                                                                                                                                |                                              |
|                                                           | 2.7 If N/PN/NI to 2.6: Was there potential for a substantial impact (on the result) of the failure to analyse participants in the group to which they were randomized?              |                   | NA                                                           |                                                                                                                                                                                                                                |                                              |
| <b>Risk of bias judgement</b>                             |                                                                                                                                                                                     | <b>Low</b>        |                                                              |                                                                                                                                                                                                                                |                                              |
| <b>Bias due to missing outcome data</b>                   | 3.1 Were data for this outcome available for all, or nearly all, participants randomized?                                                                                           |                   | N                                                            |                                                                                                                                                                                                                                |                                              |
|                                                           | 3.2 If N/PN/NI to 3.1: Is there evidence that result was not biased by missing outcome data?                                                                                        |                   | PY                                                           |                                                                                                                                                                                                                                |                                              |
|                                                           | 3.3 If N/PN to 3.2: Could missingness in the outcome depend on its true value?                                                                                                      |                   | NA                                                           |                                                                                                                                                                                                                                |                                              |
|                                                           | 3.4 If Y/PY/NI to 3.3: Is it likely that missingness in the outcome depended on its true value?                                                                                     |                   | NA                                                           |                                                                                                                                                                                                                                |                                              |
|                                                           | <b>Risk of bias judgement</b>                                                                                                                                                       |                   | <b>Low</b>                                                   | Authors identify the high attrition as a limitation of the study but also clarify that the two arms had similar attrition and no significant baseline differences between those who remained in the study and those who exited |                                              |
| <b>Bias in measurement of the outcome</b>                 | 4.1 Was the method of measuring the outcome inappropriate?                                                                                                                          |                   | N                                                            |                                                                                                                                                                                                                                |                                              |
|                                                           | 4.2 Could measurement or ascertainment of the outcome have differed between intervention groups?                                                                                    |                   | PN                                                           |                                                                                                                                                                                                                                |                                              |
|                                                           | 4.3 Were outcome assessors aware of the intervention received by study participants?                                                                                                |                   | PN                                                           |                                                                                                                                                                                                                                |                                              |
|                                                           | 4.4 If Y/PY/NI to 4.3: Could assessment of the outcome have been influenced by knowledge of intervention received?                                                                  |                   | NA                                                           |                                                                                                                                                                                                                                |                                              |
|                                                           | 4.5 If Y/PY/NI to 4.4: Is it likely that assessment of the outcome was influenced by knowledge of intervention received?                                                            |                   | NA                                                           |                                                                                                                                                                                                                                |                                              |
|                                                           | <b>Risk of bias judgement</b>                                                                                                                                                       |                   | <b>Low</b>                                                   |                                                                                                                                                                                                                                |                                              |
| <b>Bias in selection of the reported result</b>           | 5.1 Were the data that produced this result analysed in accordance with a pre-specified analysis plan that was finalized before unblinded outcome data were available for analysis? |                   | Y                                                            |                                                                                                                                                                                                                                |                                              |
|                                                           | 5.2 ... multiple eligible outcome measurements (e.g. scales, definitions, time points) within the outcome domain?                                                                   |                   | PN                                                           |                                                                                                                                                                                                                                |                                              |
|                                                           | 5.3 ... multiple eligible analyses of the data?                                                                                                                                     |                   | PN                                                           |                                                                                                                                                                                                                                |                                              |
|                                                           | <b>Risk of bias judgement</b>                                                                                                                                                       |                   | <b>Low</b>                                                   |                                                                                                                                                                                                                                |                                              |
| <b>Overall bias</b>                                       | <b>Risk of bias judgement</b>                                                                                                                                                       |                   | <b>Low</b>                                                   | The study has limitations but they're assessed and discussed by authors.                                                                                                                                                       |                                              |

|                                                           |                                                                                                                                                                                     |                      |                                                                    |                                                                                                                                 |                                              |
|-----------------------------------------------------------|-------------------------------------------------------------------------------------------------------------------------------------------------------------------------------------|----------------------|--------------------------------------------------------------------|---------------------------------------------------------------------------------------------------------------------------------|----------------------------------------------|
| <b>Unique ID</b>                                          | A448                                                                                                                                                                                | <b>Study ID</b>      | A448                                                               | <b>Assessor</b>                                                                                                                 | ST                                           |
| <b>Ref or Label</b>                                       | Two interventions for Patients with Major Depression and Severe Chronic Obstructive Pulmonary Disease: Impact on Quality of Life                                                    | <b>Aim</b>           | assignment to intervention (the 'intention-to-treat' effect)       |                                                                                                                                 |                                              |
| <b>Experimental</b>                                       | Problem-Solving-Adherence intervention (PSA)                                                                                                                                        | <b>Comparator</b>    | Personalized Intervention for Depressed Patients with COPD (PID-C) | <b>Source</b>                                                                                                                   | Journal article(s) with results of the trial |
| <b>Outcome</b>                                            | Quality of life                                                                                                                                                                     | <b>Results</b>       |                                                                    | <b>Weight</b>                                                                                                                   | 1                                            |
| <b>Domain</b>                                             | <b>Signalling question</b>                                                                                                                                                          |                      | <b>Response</b>                                                    |                                                                                                                                 | <b>Comments</b>                              |
| <b>Bias arising from the randomization process</b>        | 1.1 Was the allocation sequence random?                                                                                                                                             |                      | Y                                                                  |                                                                                                                                 |                                              |
|                                                           | 1.2 Was the allocation sequence concealed until participants were enrolled and assigned to interventions?                                                                           |                      | Y                                                                  |                                                                                                                                 |                                              |
|                                                           | 1.3 Did baseline differences between intervention groups suggest a problem with the randomization process?                                                                          |                      | PN                                                                 |                                                                                                                                 |                                              |
|                                                           | <b>Risk of bias judgement</b>                                                                                                                                                       |                      | <b>Low</b>                                                         |                                                                                                                                 |                                              |
| <b>Bias due to deviations from intended interventions</b> | 2.1. Were participants aware of their assigned intervention during the trial?                                                                                                       |                      | PN                                                                 |                                                                                                                                 |                                              |
|                                                           | 2.2. Were carers and people delivering the interventions aware of participants' assigned intervention during the trial?                                                             |                      | PY                                                                 |                                                                                                                                 |                                              |
|                                                           | 2.3. If Y/PY/NI to 2.1 or 2.2: Were there deviations from the intended intervention that arose because of the experimental context?                                                 |                      | N                                                                  |                                                                                                                                 |                                              |
|                                                           | 2.4 If Y/PY to 2.3: Were these deviations likely to have affected the outcome?                                                                                                      |                      | NA                                                                 |                                                                                                                                 |                                              |
|                                                           | 2.5. If Y/PY/NI to 2.4: Were these deviations from intended intervention balanced between groups?                                                                                   |                      | NA                                                                 |                                                                                                                                 |                                              |
|                                                           | 2.6 Was an appropriate analysis used to estimate the effect of assignment to intervention?                                                                                          |                      | NI                                                                 |                                                                                                                                 |                                              |
|                                                           | 2.7 If N/PN/NI to 2.6: Was there potential for a substantial impact (on the result) of the failure to analyse participants in the group to which they were randomized?              |                      | PN                                                                 |                                                                                                                                 |                                              |
| <b>Risk of bias judgement</b>                             |                                                                                                                                                                                     | <b>Some concerns</b> |                                                                    |                                                                                                                                 |                                              |
| <b>Bias due to missing outcome data</b>                   | 3.1 Were data for this outcome available for all, or nearly all, participants randomized?                                                                                           |                      | N                                                                  |                                                                                                                                 |                                              |
|                                                           | 3.2 If N/PN/NI to 3.1: Is there evidence that result was not biased by missing outcome data?                                                                                        |                      | PN                                                                 |                                                                                                                                 |                                              |
|                                                           | 3.3 If N/PN to 3.2: Could missingness in the outcome depend on its true value?                                                                                                      |                      | PN                                                                 |                                                                                                                                 |                                              |
|                                                           | 3.4 If Y/PY/NI to 3.3: Is it likely that missingness in the outcome depended on its true value?                                                                                     |                      | NA                                                                 |                                                                                                                                 |                                              |
|                                                           | <b>Risk of bias judgement</b>                                                                                                                                                       |                      | <b>Some concerns</b>                                               | small sample with huge drop-out before randomisation. Missingness of data is not widely assessed in discussion                  |                                              |
| <b>Bias in measurement of the outcome</b>                 | 4.1 Was the method of measuring the outcome inappropriate?                                                                                                                          |                      | N                                                                  |                                                                                                                                 |                                              |
|                                                           | 4.2 Could measurement or ascertainment of the outcome have differed between intervention groups?                                                                                    |                      | PN                                                                 |                                                                                                                                 |                                              |
|                                                           | 4.3 Were outcome assessors aware of the intervention received by study participants?                                                                                                |                      | N                                                                  |                                                                                                                                 |                                              |
|                                                           | 4.4 If Y/PY/NI to 4.3: Could assessment of the outcome have been influenced by knowledge of intervention received?                                                                  |                      | NA                                                                 |                                                                                                                                 |                                              |
|                                                           | 4.5 If Y/PY/NI to 4.4: Is it likely that assessment of the outcome was influenced by knowledge of intervention received?                                                            |                      | NA                                                                 |                                                                                                                                 |                                              |
|                                                           | <b>Risk of bias judgement</b>                                                                                                                                                       |                      | <b>Low</b>                                                         |                                                                                                                                 |                                              |
| <b>Bias in selection of the reported result</b>           | 5.1 Were the data that produced this result analysed in accordance with a pre-specified analysis plan that was finalized before unblinded outcome data were available for analysis? |                      | Y                                                                  |                                                                                                                                 |                                              |
|                                                           | 5.2 ... multiple eligible outcome measurements (e.g. scales, definitions, time points) within the outcome domain?                                                                   |                      | PN                                                                 |                                                                                                                                 |                                              |
|                                                           | 5.3 ... multiple eligible analyses of the data?                                                                                                                                     |                      | PN                                                                 |                                                                                                                                 |                                              |
|                                                           | <b>Risk of bias judgement</b>                                                                                                                                                       |                      | <b>Low</b>                                                         | The Hypothesis was not supported by analysis, so it's less likely for this study to have a great selection bias                 |                                              |
| <b>Overall bias</b>                                       | <b>Risk of bias judgement</b>                                                                                                                                                       |                      | <b>Some concerns</b>                                               | One therapist administrated both intervention, plus there has been a huge drop-out before randomisation and the sample is small |                                              |

|                                                           |                                                                                                                                                                                     |                   |                                                                    |                 |                                                                                                                    |
|-----------------------------------------------------------|-------------------------------------------------------------------------------------------------------------------------------------------------------------------------------------|-------------------|--------------------------------------------------------------------|-----------------|--------------------------------------------------------------------------------------------------------------------|
| <b>Unique ID</b>                                          | A446                                                                                                                                                                                | <b>Study ID</b>   | A446                                                               | <b>Assessor</b> | ST                                                                                                                 |
| <b>Ref or Label</b>                                       | Two Behavioral Interventions for Patients with Major Depression and Severe COPD                                                                                                     | <b>Aim</b>        | assignment to intervention (the 'intention-to-treat' effect)       |                 |                                                                                                                    |
| <b>Experimental</b>                                       | Problem-Solving-Adherence intervention (PSA)                                                                                                                                        | <b>Comparator</b> | Personalized Intervention for depressed patients with COPD (PID-C) | <b>Source</b>   | Journal article(s) with results of the trial                                                                       |
| <b>Outcome</b>                                            | Depressive symptoms                                                                                                                                                                 | <b>Results</b>    |                                                                    | <b>Weight</b>   | 1                                                                                                                  |
| <b>Domain</b>                                             | <b>Signalling question</b>                                                                                                                                                          |                   | <b>Response</b>                                                    |                 | <b>Comments</b>                                                                                                    |
| <b>Bias arising from the randomization process</b>        | 1.1 Was the allocation sequence random?                                                                                                                                             |                   | Y                                                                  |                 |                                                                                                                    |
|                                                           | 1.2 Was the allocation sequence concealed until participants were enrolled and assigned to interventions?                                                                           |                   | Y                                                                  |                 |                                                                                                                    |
|                                                           | 1.3 Did baseline differences between intervention groups suggest a problem with the randomization process?                                                                          |                   | PN                                                                 |                 |                                                                                                                    |
|                                                           | <b>Risk of bias judgement</b>                                                                                                                                                       |                   | <b>Low</b>                                                         |                 |                                                                                                                    |
| <b>Bias due to deviations from intended interventions</b> | 2.1. Were participants aware of their assigned intervention during the trial?                                                                                                       |                   | PN                                                                 |                 | But Treatment fidelity ratings were performed by a trained psychologist, who was not a member of the research team |
|                                                           | 2.2. Were carers and people delivering the interventions aware of participants' assigned intervention during the trial?                                                             |                   | Y                                                                  |                 |                                                                                                                    |
|                                                           | 2.3. If Y/PY/NI to 2.1 or 2.2: Were there deviations from the intended intervention that arose because of the experimental context?                                                 |                   | N                                                                  |                 |                                                                                                                    |
|                                                           | 2.4 If Y/PY to 2.3: Were these deviations likely to have affected the outcome?                                                                                                      |                   | NA                                                                 |                 |                                                                                                                    |
|                                                           | 2.5. If Y/PY/NI to 2.4: Were these deviations from intended intervention balanced between groups?                                                                                   |                   | NA                                                                 |                 |                                                                                                                    |
|                                                           | 2.6 Was an appropriate analysis used to estimate the effect of assignment to intervention?                                                                                          |                   | PY                                                                 |                 |                                                                                                                    |
|                                                           | 2.7 If N/PN/NI to 2.6: Was there potential for a substantial impact (on the result) of the failure to analyse participants in the group to which they were randomized?              |                   | NA                                                                 |                 |                                                                                                                    |
|                                                           | <b>Risk of bias judgement</b>                                                                                                                                                       |                   | <b>Low</b>                                                         |                 |                                                                                                                    |
| <b>Bias due to missing outcome data</b>                   | 3.1 Were data for this outcome available for all, or nearly all, participants randomized?                                                                                           |                   | N                                                                  |                 |                                                                                                                    |
|                                                           | 3.2 If N/PN/NI to 3.1: Is there evidence that result was not biased by missing outcome data?                                                                                        |                   | PY                                                                 |                 |                                                                                                                    |
|                                                           | 3.3 If N/PN to 3.2: Could missingness in the outcome depend on its true value?                                                                                                      |                   | NA                                                                 |                 |                                                                                                                    |
|                                                           | 3.4 If Y/PY/NI to 3.3: Is it likely that missingness in the outcome depended on its true value?                                                                                     |                   | NA                                                                 |                 |                                                                                                                    |
|                                                           | <b>Risk of bias judgement</b>                                                                                                                                                       |                   | <b>Low</b>                                                         |                 |                                                                                                                    |
| <b>Bias in measurement of the outcome</b>                 | 4.1 Was the method of measuring the outcome inappropriate?                                                                                                                          |                   | N                                                                  |                 |                                                                                                                    |
|                                                           | 4.2 Could measurement or ascertainment of the outcome have differed between intervention groups?                                                                                    |                   | PN                                                                 |                 |                                                                                                                    |
|                                                           | 4.3 Were outcome assessors aware of the intervention received by study participants?                                                                                                |                   | N                                                                  |                 |                                                                                                                    |
|                                                           | 4.4 If Y/PY/NI to 4.3: Could assessment of the outcome have been influenced by knowledge of intervention received?                                                                  |                   | NA                                                                 |                 |                                                                                                                    |
|                                                           | 4.5 If Y/PY/NI to 4.4: Is it likely that assessment of the outcome was influenced by knowledge of intervention received?                                                            |                   | NA                                                                 |                 |                                                                                                                    |
|                                                           | <b>Risk of bias judgement</b>                                                                                                                                                       |                   | <b>Low</b>                                                         |                 |                                                                                                                    |
| <b>Bias in selection of the reported result</b>           | 5.1 Were the data that produced this result analysed in accordance with a pre-specified analysis plan that was finalized before unblinded outcome data were available for analysis? |                   | PY                                                                 |                 |                                                                                                                    |
|                                                           | 5.2 ... multiple eligible outcome measurements (e.g. scales, definitions, time points) within the outcome domain?                                                                   |                   | PN                                                                 |                 |                                                                                                                    |
|                                                           | 5.3 ... multiple eligible analyses of the data?                                                                                                                                     |                   | PN                                                                 |                 |                                                                                                                    |
|                                                           | <b>Risk of bias judgement</b>                                                                                                                                                       |                   | <b>Low</b>                                                         |                 | The hypothesis was not confirmed so it's less likely for the authors to report selected data                       |
| <b>Overall bias</b>                                       | <b>Risk of bias judgement</b>                                                                                                                                                       |                   | <b>Low</b>                                                         |                 |                                                                                                                    |

|                                                           |                                                                                                                                                                                     |                   |                                                                    |                 |                                              |
|-----------------------------------------------------------|-------------------------------------------------------------------------------------------------------------------------------------------------------------------------------------|-------------------|--------------------------------------------------------------------|-----------------|----------------------------------------------|
| <b>Unique ID</b>                                          | A447                                                                                                                                                                                | <b>Study ID</b>   | A447                                                               | <b>Assessor</b> | ST                                           |
| <b>Ref or Label</b>                                       | Two interventions for Patients with Major Depression and Severe COPD: impact on Dyspnea-Related Disability                                                                          | <b>Aim</b>        | assignment to intervention (the 'intention-to-treat' effect)       |                 |                                              |
| <b>Experimental</b>                                       | Problem-Solving-Adherence intervention (PSA)                                                                                                                                        | <b>Comparator</b> | Personalized Intervention for depressed patients with COPD (PID-C) | <b>Source</b>   | Journal article(s) with results of the trial |
| <b>Outcome</b>                                            | Dyspnea related disability                                                                                                                                                          | <b>Results</b>    |                                                                    | <b>Weight</b>   | 1                                            |
| <b>Domain</b>                                             | <b>Signalling question</b>                                                                                                                                                          |                   | <b>Response</b>                                                    |                 | <b>Comments</b>                              |
| <b>Bias arising from the randomization process</b>        | 1.1 Was the allocation sequence random?                                                                                                                                             |                   | Y                                                                  |                 |                                              |
|                                                           | 1.2 Was the allocation sequence concealed until participants were enrolled and assigned to interventions?                                                                           |                   | Y                                                                  |                 |                                              |
|                                                           | 1.3 Did baseline differences between intervention groups suggest a problem with the randomization process?                                                                          |                   | PN                                                                 |                 |                                              |
|                                                           | <b>Risk of bias judgement</b>                                                                                                                                                       |                   | <b>Low</b>                                                         |                 |                                              |
| <b>Bias due to deviations from intended interventions</b> | 2.1. Were participants aware of their assigned intervention during the trial?                                                                                                       |                   | PN                                                                 |                 |                                              |
|                                                           | 2.2. Were carers and people delivering the interventions aware of participants' assigned intervention during the trial?                                                             |                   | Y                                                                  |                 |                                              |
|                                                           | 2.3. If Y/PY/NI to 2.1 or 2.2: Were there deviations from the intended intervention that arose because of the experimental context?                                                 |                   | N                                                                  |                 |                                              |
|                                                           | 2.4 If Y/PY to 2.3: Were these deviations likely to have affected the outcome?                                                                                                      |                   | NA                                                                 |                 |                                              |
|                                                           | 2.5. If Y/PY/NI to 2.4: Were these deviations from intended intervention balanced between groups?                                                                                   |                   | NA                                                                 |                 |                                              |
|                                                           | 2.6 Was an appropriate analysis used to estimate the effect of assignment to intervention?                                                                                          |                   | PY                                                                 |                 |                                              |
|                                                           | 2.7 If N/PN/NI to 2.6: Was there potential for a substantial impact (on the result) of the failure to analyse participants in the group to which they were randomized?              |                   | NA                                                                 |                 |                                              |
| <b>Risk of bias judgement</b>                             |                                                                                                                                                                                     | <b>Low</b>        |                                                                    |                 |                                              |
| <b>Bias due to missing outcome data</b>                   | 3.1 Were data for this outcome available for all, or nearly all, participants randomized?                                                                                           |                   | N                                                                  |                 |                                              |
|                                                           | 3.2 If N/PN/NI to 3.1: Is there evidence that result was not biased by missing outcome data?                                                                                        |                   | PY                                                                 |                 |                                              |
|                                                           | 3.3 If N/PN to 3.2: Could missingness in the outcome depend on its true value?                                                                                                      |                   | NA                                                                 |                 |                                              |
|                                                           | 3.4 If Y/PY/NI to 3.3: Is it likely that missingness in the outcome depended on its true value?                                                                                     |                   | NA                                                                 |                 |                                              |
|                                                           | <b>Risk of bias judgement</b>                                                                                                                                                       |                   | <b>Low</b>                                                         |                 |                                              |
| <b>Bias in measurement of the outcome</b>                 | 4.1 Was the method of measuring the outcome inappropriate?                                                                                                                          |                   | N                                                                  |                 |                                              |
|                                                           | 4.2 Could measurement or ascertainment of the outcome have differed between intervention groups?                                                                                    |                   | PN                                                                 |                 |                                              |
|                                                           | 4.3 Were outcome assessors aware of the intervention received by study participants?                                                                                                |                   | N                                                                  |                 |                                              |
|                                                           | 4.4 If Y/PY/NI to 4.3: Could assessment of the outcome have been influenced by knowledge of intervention received?                                                                  |                   | NA                                                                 |                 |                                              |
|                                                           | 4.5 If Y/PY/NI to 4.4: Is it likely that assessment of the outcome was influenced by knowledge of intervention received?                                                            |                   | NA                                                                 |                 |                                              |
|                                                           | <b>Risk of bias judgement</b>                                                                                                                                                       |                   | <b>Low</b>                                                         |                 |                                              |
| <b>Bias in selection of the reported result</b>           | 5.1 Were the data that produced this result analysed in accordance with a pre-specified analysis plan that was finalized before unblinded outcome data were available for analysis? |                   | PY                                                                 |                 |                                              |
|                                                           | 5.2 ... multiple eligible outcome measurements (e.g. scales, definitions, time points) within the outcome domain?                                                                   |                   | PN                                                                 |                 |                                              |
|                                                           | 5.3 ... multiple eligible analyses of the data?                                                                                                                                     |                   | PN                                                                 |                 |                                              |
|                                                           | <b>Risk of bias judgement</b>                                                                                                                                                       |                   | <b>Low</b>                                                         |                 |                                              |
| <b>Overall bias</b>                                       | <b>Risk of bias judgement</b>                                                                                                                                                       |                   | <b>Low</b>                                                         |                 |                                              |

|      | Randomization process | Deviations from intended interve | Missing outcome data | Measurement of the outcome | Selection of the reported result | Overall |
|------|-----------------------|----------------------------------|----------------------|----------------------------|----------------------------------|---------|
| A318 |                       |                                  |                      |                            |                                  |         |
| A452 |                       |                                  |                      |                            |                                  |         |
| A448 |                       |                                  |                      |                            |                                  |         |
| A446 |                       |                                  |                      |                            |                                  |         |
| A447 |                       |                                  |                      |                            |                                  |         |

Low risk  
 Some concerns  
 High risk

| Study (ref)                                                                                                                | Authors, year                          | Research question or objective clearly stated? | Study population clearly specified and defined? | Participation rate of eligible persons at least 50%? | Subjects selected or recruited from the same or similar populations (including the same time period)? inclusion and exclusion criteria for being in the study prespecified and applied uniformly to all participants? | Sample size justification, power description, or variance and effect estimates provided? | Exposure(s) of interest measured prior to the outcome(s) being measured? | Time frame sufficient so that one could reasonably expect to see an association between exposure and outcome if it existed? | Did the study examine different levels of the exposure as related to the outcome (e.g., categories of exposure, or exposure measured as continuous variable)? | Exposure measures (independent variables) clearly defined, valid, reliable, and implemented consistently across all study participants? | Exposure(s) assessed more than once over time? | Outcome measures (dependent variables) clearly defined, valid, reliable, and implemented consistently across all study participants? | Outcome assessors blinded to the exposure status of participants? | Loss to follow-up after baseline 20% or less? | Key potential confounding variables measured and adjusted statistically for their impact on the relationship between exposure(s) and outcome(s)? | TOTAL |
|----------------------------------------------------------------------------------------------------------------------------|----------------------------------------|------------------------------------------------|-------------------------------------------------|------------------------------------------------------|-----------------------------------------------------------------------------------------------------------------------------------------------------------------------------------------------------------------------|------------------------------------------------------------------------------------------|--------------------------------------------------------------------------|-----------------------------------------------------------------------------------------------------------------------------|---------------------------------------------------------------------------------------------------------------------------------------------------------------|-----------------------------------------------------------------------------------------------------------------------------------------|------------------------------------------------|--------------------------------------------------------------------------------------------------------------------------------------|-------------------------------------------------------------------|-----------------------------------------------|--------------------------------------------------------------------------------------------------------------------------------------------------|-------|
| Adherence and healthcare utilization among older adults with COPD and depression                                           | Albrecht et al., 2017 <sup>(37)</sup>  | YES                                            | YES                                             | NO                                                   | YES                                                                                                                                                                                                                   | NO                                                                                       | YES                                                                      | YES                                                                                                                         | YES                                                                                                                                                           | YES                                                                                                                                     | YES                                            | YES                                                                                                                                  | CD                                                                | CD                                            | YES                                                                                                                                              | 10    |
| Adherence to COPD free triple inhaled therapy in the real world: a primary care based study                                | Zucchelli et al., 2020 <sup>(40)</sup> | YES                                            | YES                                             | CD                                                   | YES                                                                                                                                                                                                                   | NO                                                                                       | N/A                                                                      | N/A                                                                                                                         | N/A                                                                                                                                                           | YES                                                                                                                                     | YES                                            | YES                                                                                                                                  | N/A                                                               | CD                                            | CD                                                                                                                                               | 6     |
| Adherence to COPD treatment in turkey and Saudi Arabia: Results of the ADCARE study                                        | Kokturk et al., 2018 <sup>(41)</sup>   | YES                                            | YES                                             | CD                                                   | YES                                                                                                                                                                                                                   | YES                                                                                      | N/A                                                                      | N/A                                                                                                                         | N/A                                                                                                                                                           | YES                                                                                                                                     | NO                                             | YES                                                                                                                                  | N/A                                                               | N/A                                           | YES                                                                                                                                              | 7     |
| Adherence to long-term oxygen therapy in patients with chronic obstructive pulmonary disease                               | Gauthier et al., 2018 <sup>(31)</sup>  | YES                                            | YES                                             | YES                                                  | YES                                                                                                                                                                                                                   | NO                                                                                       | N/A                                                                      | N/A                                                                                                                         | NO                                                                                                                                                            | NO (not clear how they were measured)                                                                                                   | NO                                             | YES                                                                                                                                  | N/A                                                               | N/A                                           | CD                                                                                                                                               | 5     |
| Adherence to Maintenance Medications among Older Adults with Chronic Obstructive Pulmonary Disease. The Role of Depression | Albrecht et al., 2016 <sup>(41)</sup>  | YES                                            | YES                                             | NO                                                   | YES                                                                                                                                                                                                                   | NO                                                                                       | YES                                                                      | N/A                                                                                                                         | YES                                                                                                                                                           | YES                                                                                                                                     | YES                                            | YES                                                                                                                                  | CD                                                                | CD                                            | YES                                                                                                                                              | 9     |
| Association between Depression and Maintenance Medication Adherence among Medicare Beneficiaries with COPD                 | Qian et al., 2014 <sup>(52)</sup>      | YES                                            | YES                                             | YES                                                  | YES                                                                                                                                                                                                                   | NO                                                                                       | N/A                                                                      | YES                                                                                                                         | NO                                                                                                                                                            | YES                                                                                                                                     | NO                                             | YES                                                                                                                                  | CD                                                                | N/A                                           | YES                                                                                                                                              | 8     |
| Association between social support and self-care behaviors in adults with chronic obstructive pulmonary disease            | Chen et al., 2017 <sup>(41)</sup>      | YES                                            | YES                                             | YES                                                  | YES                                                                                                                                                                                                                   | NO                                                                                       | N/A                                                                      | N/A                                                                                                                         | YES                                                                                                                                                           | YES                                                                                                                                     | YES                                            | YES                                                                                                                                  | CD                                                                | YES                                           | YES                                                                                                                                              | 10    |
| COPD patients' self-reported adherence, psychosocial factors and mild cognitive impairment in pulmonary rehabilitation     | Pierobon et al., 2017 <sup>(46)</sup>  | YES                                            | YES                                             | YES                                                  | YES                                                                                                                                                                                                                   | NO                                                                                       | YES                                                                      | CD                                                                                                                          | YES                                                                                                                                                           | YES                                                                                                                                     | NO                                             | YES                                                                                                                                  | N/A                                                               | N/A                                           | YES                                                                                                                                              | 9     |
| Managing Mood Disorders in Patients Attending Pulmonary Rehabilitation Clinics                                             | Doyle et al., 2013 <sup>(53)</sup>     | YES                                            | NO                                              | CD                                                   | CD                                                                                                                                                                                                                    | NO                                                                                       | YES                                                                      | CD                                                                                                                          | NO                                                                                                                                                            | YES                                                                                                                                     | NO                                             | CD                                                                                                                                   | CD                                                                | YES                                           | CD                                                                                                                                               | 4     |
| Patient outcomes according to COPD action plan adherence                                                                   | Choi et al., 2014 <sup>(48)</sup>      | YES                                            | YES                                             | CD                                                   | YES                                                                                                                                                                                                                   | YES                                                                                      | CD                                                                       | CD                                                                                                                          | YES                                                                                                                                                           | YES                                                                                                                                     | NO                                             | YES                                                                                                                                  | CD                                                                | N/A                                           | CD                                                                                                                                               | 7     |

Methodological Quality evaluation: Observational, cross-sectional and cohort studies –Part I

| Study (ref)                                                                                                                                                   | Authors, year                     | Research question or objective clearly stated? | Study population clearly specified and defined? | Participation rate of eligible persons at least 50%? | Subjects selected or recruited from the same or similar populations (including the same time period)? Inclusion and exclusion criteria for being in the study prespecified and applied uniformly to all participants? | Sample size justification, power description, or variance and effect estimates provided? | Exposure(s) of interest measured prior to the outcome(s) being measured? | Timeframe sufficient so that one could reasonably expect to see an association between exposure and outcome if it existed? | Did the study examine different levels of the exposure as related to the outcome (e.g., categories of exposure, or exposure measured as continuous variable)? | Exposure measures (independent variables) clearly defined, valid, reliable, and implemented consistently across all study participants? | Exposure(s) assessed more than once over time? | Outcome measures (dependent variables) clearly defined, valid, reliable, and implemented consistently across all study participants? | Outcome assessors blinded to the exposure status of participants? | Loss to follow-up after baseline 20% or less? | Key potential confounding variables measured and adjusted statistically for their impact on the relationship between exposure(s) and outcome(s)? | TOTAL |
|---------------------------------------------------------------------------------------------------------------------------------------------------------------|-----------------------------------|------------------------------------------------|-------------------------------------------------|------------------------------------------------------|-----------------------------------------------------------------------------------------------------------------------------------------------------------------------------------------------------------------------|------------------------------------------------------------------------------------------|--------------------------------------------------------------------------|----------------------------------------------------------------------------------------------------------------------------|---------------------------------------------------------------------------------------------------------------------------------------------------------------|-----------------------------------------------------------------------------------------------------------------------------------------|------------------------------------------------|--------------------------------------------------------------------------------------------------------------------------------------|-------------------------------------------------------------------|-----------------------------------------------|--------------------------------------------------------------------------------------------------------------------------------------------------|-------|
| Potential Risk Factors for Medication Non-Adherence in Patients With Chronic Obstructive Pulmonary Disease (COPD)                                             | Khdour et al., 2012 (25)          | YES                                            | YES                                             | CD                                                   | YES                                                                                                                                                                                                                   | NO                                                                                       | N/A                                                                      | N/A                                                                                                                        | YES                                                                                                                                                           | YES                                                                                                                                     | NO                                             | YES                                                                                                                                  | CD                                                                | N/A                                           | YES                                                                                                                                              | 7     |
| Psychological Factors Associated With Use of Home Nebulized Therapy for COPD                                                                                  | Bosley et al., 1996 (42)          | YES                                            | YES                                             | YES                                                  | NO                                                                                                                                                                                                                    | NO                                                                                       | CD                                                                       | N/A                                                                                                                        | NO                                                                                                                                                            | YES                                                                                                                                     | YES                                            | YES                                                                                                                                  | CD                                                                | YES                                           | CD                                                                                                                                               | 7     |
| Psychopathology and Illness Beliefs Influence COPD Self-Management                                                                                            | Dowson et al., 2004 (41)          | YES                                            | YES                                             | CD                                                   | YES                                                                                                                                                                                                                   | NO                                                                                       | N/A                                                                      | N/A                                                                                                                        | N/A                                                                                                                                                           | YES                                                                                                                                     | NO                                             | YES                                                                                                                                  | CD                                                                | N/A                                           | CD                                                                                                                                               | 5     |
| The association of antidepressant treatment with COPD maintenance medication use and adherence in a comorbid Medicare population: A longitudinal cohort study | Wei et al., 2018 (44)             | YES                                            | YES                                             | NO                                                   | YES                                                                                                                                                                                                                   | NO                                                                                       | YES                                                                      | YES                                                                                                                        | YES                                                                                                                                                           | YES                                                                                                                                     | YES                                            | YES                                                                                                                                  | CD                                                                | CD                                            | YES                                                                                                                                              | 10    |
| The effects of anxiety and depression symptoms on treatment adherence in COPD patients                                                                        | Turan et al., 2014 (50)           | YES                                            | YES                                             | CD                                                   | YES                                                                                                                                                                                                                   | NO                                                                                       | N/A                                                                      | N/A                                                                                                                        | NO                                                                                                                                                            | YES                                                                                                                                     | YES                                            | YES                                                                                                                                  | CD                                                                | NO                                            | CD                                                                                                                                               | 6     |
| Exploring variables associated with medication non-adherence in patients with COPD                                                                            | Jarab & Mukattash, 2019 (47)      | YES                                            | YES                                             | YES                                                  | YES                                                                                                                                                                                                                   | NO                                                                                       | N/A                                                                      | N/A                                                                                                                        | YES                                                                                                                                                           | YES                                                                                                                                     | NO                                             | YES                                                                                                                                  | CD                                                                | N/A                                           | YES                                                                                                                                              | 8     |
| Adherence to a Maintenance Exercise Program 1 Year After Pulmonary Rehabilitation: What Are the Predictors of Dropout?                                        | Heerema-Poelman et al., 2013 (39) | YES                                            | YES                                             | CD                                                   | YES                                                                                                                                                                                                                   | NO                                                                                       | CD                                                                       | YES                                                                                                                        | YES                                                                                                                                                           | YES                                                                                                                                     | YES                                            | YES                                                                                                                                  | CD                                                                | NO                                            | YES                                                                                                                                              | 9     |
| Depressed Mood Predicts Pulmonary Rehabilitation Completion among Women, but not Men                                                                          | Busch et al., 2014 (38)           | YES                                            | YES                                             | CD                                                   | YES                                                                                                                                                                                                                   | NO                                                                                       | N/A                                                                      | N/A                                                                                                                        | YES                                                                                                                                                           | YES                                                                                                                                     | CD                                             | YES                                                                                                                                  | CD                                                                | YES                                           | YES                                                                                                                                              | 8     |

Methodological Quality evaluation: Observational, cross-sectional and cohort studies –Part II

|                                                                                                                                     |                                | Section A: Are the results valid?                        |                                                                                                               |                                                                                                       |                                                                                                 |                                                                                               |                                                                                      | Section B: What are the results?                   |                                              |                                                                                                         | Section C: Will the results help locally?                                                                                                                                                              |                     |
|-------------------------------------------------------------------------------------------------------------------------------------|--------------------------------|----------------------------------------------------------|---------------------------------------------------------------------------------------------------------------|-------------------------------------------------------------------------------------------------------|-------------------------------------------------------------------------------------------------|-----------------------------------------------------------------------------------------------|--------------------------------------------------------------------------------------|----------------------------------------------------|----------------------------------------------|---------------------------------------------------------------------------------------------------------|--------------------------------------------------------------------------------------------------------------------------------------------------------------------------------------------------------|---------------------|
| Study (ref)                                                                                                                         | Authors, year                  | Was there a clear statement of the aims of the research? | Is a qualitative methodology appropriate?                                                                     | Was the research design appropriate to address the aims of the research?                              | Was the recruitment strategy appropriate to the aims of the research?                           | Was the data collected in a way that addressed the research issue?                            | Has the relationship between researcher and participants been adequately considered? | Have ethical issues been taken into consideration? | Was the data analysis sufficiently rigorous? | Is there a clear statement of findings?                                                                 | How valuable is the research?                                                                                                                                                                          | TOTAL               |
| An intervention to improve depression care in older adults with COPD                                                                | Sirey et al, 2007 (30)         | YES                                                      | to assess the "barriers to care", YES, but it's not clear if the entire program has a qualitative methodology | Case report (CR). The research design is not clear and the authors do not discuss other possibilities | CR. There's no discussion around the recruitment and no inclusion/exclusion criteria are stated | overall YES, but many issues are not clear due to the generic description of the intervention | NO                                                                                   | NO                                                 | CR, there's no description of data analysis  | NO the findings are partially stated and there's no discussion about contradictory data and credibility | Poorly: The contribution of the study is partially stated but not thoroughly, they don't identify new areas of research or discuss whether or how the findings can be transferred to other populations | High risk of bias   |
| How to cope with the mask? Experiences of mask treatment in patients with acute chronic obstructive pulmonary disease-exacerbations | Torheim & Gjengedal, 2010 (31) | YES                                                      | YES                                                                                                           | YES                                                                                                   | CR (not much discussion over the recruitment)                                                   | YES                                                                                           | NO                                                                                   | YES                                                | CR (no contradictory data nor bias assessed) | YES (but not much discussion about contradictory data and credibility)                                  | The research is valuable: authors provided limitations and strengths, and implication for practice, even if implications for future research aren't widely discussed                                   | medium risk of bias |

Methodological Quality evaluation: Qualitative studies



| Study (ref)                                                                                                                                                         | Authors, year                        | Is the review based on a focused question that is adequately formulated and described? | Were eligibility criteria for included and excluded studies predefined and specified? | Did the literature search strategy use a comprehensive, systematic approach? | Were titles, abstracts, and full-text articles dually and independently reviewed for inclusion and exclusion to minimize bias? | Was the quality of each included study rated independently by two or more reviewers using a standard method to appraise its internal validity? | Were the included studies listed along with important characteristics and results of each study? | Was publication bias assessed? | Was heterogeneity assessed? (This question applies only to meta-analyses.) | TOTAL |
|---------------------------------------------------------------------------------------------------------------------------------------------------------------------|--------------------------------------|----------------------------------------------------------------------------------------|---------------------------------------------------------------------------------------|------------------------------------------------------------------------------|--------------------------------------------------------------------------------------------------------------------------------|------------------------------------------------------------------------------------------------------------------------------------------------|--------------------------------------------------------------------------------------------------|--------------------------------|----------------------------------------------------------------------------|-------|
| Anxiety and Depression in Chronic Obstructive Pulmonary Disease: Recognition and Management                                                                         | Yohannes et al., 2018 (23)           | NO                                                                                     | NO                                                                                    | CD                                                                           | CD                                                                                                                             | CD                                                                                                                                             | NO                                                                                               | NO                             | N/A                                                                        | 0     |
| Current Perspectives on Management of Co-Morbid Depression in COPD                                                                                                  | Norwood & Balkissoon, 2005 (74)      | YES                                                                                    | NO                                                                                    | CD                                                                           | CD                                                                                                                             | CD                                                                                                                                             | YES                                                                                              | NO                             | N/A                                                                        | 2     |
| Depression comorbidity with COPD                                                                                                                                    | Alexopoulos & Latoussakis, 2004 (57) | YES                                                                                    | NO                                                                                    | CD                                                                           | CD                                                                                                                             | CD                                                                                                                                             | NO                                                                                               | NO                             | N/A                                                                        | 1     |
| Developing an Intervention for Depressed, Chronically Medically Ill Elders: A Model From COPD                                                                       | Alexopoulos et al., 2008 (72)        | YES                                                                                    | NO                                                                                    | CD                                                                           | CD                                                                                                                             | CD                                                                                                                                             | NO                                                                                               | NO                             | N/A                                                                        | 1     |
| Pharmacologic Treatment of Depression in Older Patients with COPD: Impact on the Course of the Disease and Health Outcomes                                          | Yohannes & Alexopoulos, 2014 (18)    | YES                                                                                    | NO                                                                                    | NO                                                                           | CD                                                                                                                             | CD                                                                                                                                             | YES                                                                                              | NO                             | N/A                                                                        | 2     |
| Risk factors of chronic obstructive pulmonary disease exacerbations                                                                                                 | Hogea et al., 2020 (55)              | YES                                                                                    | NO                                                                                    | CD                                                                           | CD                                                                                                                             | CD                                                                                                                                             | NO                                                                                               | NO                             | N/A                                                                        | 1     |
| From mild cognitive impairment (MCI) to dementia in Chronic Obstructive Pulmonary Disease. Implications for clinical practice and disease management: A mini-review | Ranzini et al., 2020 (56)            | YES                                                                                    | NO                                                                                    | CD                                                                           | YES                                                                                                                            | CD                                                                                                                                             | NO                                                                                               | NO                             | N/A                                                                        | 2     |
| Prevalence, Contribution to Disease Burden and Management of Comorbid Depression and Anxiety in Chronic Obstructive Pulmonary Disease: A Narrative Review.          | Zareifopoulos et al., 2019 (54)      | YES                                                                                    | YES                                                                                   | YES                                                                          | YES                                                                                                                            | CD                                                                                                                                             | YES                                                                                              | NO                             | N/A                                                                        | 5     |
| Barriers and Strategies for Improving Medication Adherence Among People Living With COPD: A Systematic Review                                                       | Bhattarai et al., 2020 (73)          | YES                                                                                    | YES                                                                                   | YES                                                                          | YES                                                                                                                            | YES                                                                                                                                            | YES                                                                                              | NO                             | N/A                                                                        | 6     |

Methodological Quality evaluation: Reviews

| <b>Ref.</b>                                     | <b>Kind of study</b> | <b>RoB</b> |
|-------------------------------------------------|----------------------|------------|
| Albrecht et al., 2017 <sup>(37)</sup>           | QNT                  |            |
| Zucchelli et al., 2020 <sup>(40)</sup>          | QNT                  |            |
| Kokturk et al., 2018 <sup>(45)</sup>            | QNT                  |            |
| Gauthier et al., 2018 <sup>(51)</sup>           | QNT                  |            |
| Albrecht et al., 2016 <sup>(43)</sup>           | QNT                  |            |
| Qian et al., 2014 <sup>(52)</sup>               | QNT                  |            |
| Chen et al., 2017 <sup>(41)</sup>               | QNT                  |            |
| Pierobon et al., 2017 <sup>(46)</sup>           | QNT                  |            |
| Doyle et al., 2013 <sup>(53)</sup>              | QNT                  |            |
| Choi et al., 2014 <sup>(48)</sup>               | QNT                  |            |
| Khdour et al., 2012 <sup>(25)</sup>             | QNT                  |            |
| Bosley et al., 1996 <sup>(42)</sup>             | QNT                  |            |
| Dowson et al., 2004 <sup>(49)</sup>             | QNT                  |            |
| Wei et al., 2018 <sup>(44)</sup>                | QNT                  |            |
| Turan et al., 2014 <sup>(50)</sup>              | QNT                  |            |
| Jarab & Mukattash, 2019 <sup>(47)</sup>         | QNT                  |            |
| Heerema-Poelman et al., 2013 <sup>(39)</sup>    | QNT                  |            |
| Busch et al., 2014 <sup>(38)</sup>              | QNT                  |            |
| Yohannes et al., 2018 <sup>(23)</sup>           | Review               |            |
| Norwood & Balkissoon, 2005 <sup>(74)</sup>      | Review               |            |
| Alexopoulos & Latoussakis, 2004 <sup>(57)</sup> | Review               |            |
| Alexopoulos et al., 2008 <sup>(72)</sup>        | Review               |            |
| Yohannes & Alexopoulos, 2014 <sup>(18)</sup>    | Review               |            |
| Hogea et al., 2020 <sup>(55)</sup>              | Review               |            |
| Ranzini et al.; 2020 <sup>(56)</sup>            | Review               |            |
| Zareifopoulos et al., 2019 <sup>(54)</sup>      | Review               |            |
| Sirey et al., 2007 <sup>(30)</sup>              | QL                   |            |
| Torheim & Gjengedal, 2010 <sup>(31)</sup>       | QL                   |            |
